CORRECTION

# Correction: Bronchoalveolar lavage (BAL) cells in idiopathic pulmonary fibrosis express a complex pro-inflammatory, pro-repair, angiogenic activation pattern, likely associated with macrophage iron accumulation

The *PLOS ONE* Staff

There are errors in the Funding section. The correct funding information is as follows: This study was supported by University of Florida Departmental funds (UF project #00127916(C. S.) and #00045513(M.L.B)), and European Brain Research Institute funds (PAINCAGE FP7 #603191 (I.A.)). The funders had no role in study design, data collection and analysis, decision to publish, or preparation of the manuscript.

The publisher apologizes for the error.

## Reference

1. Lee J, Arisi I, Puxeddu E, Mramba LK, Amicosante M, Swaisgood CM, et al. (2018) Bronchoalveolar lavage (BAL) cells in idiopathic pulmonary fibrosis express a complex pro-inflammatory, pro-repair, angiogenic activation pattern, likely associated with macrophage iron accumulation. *PLoS ONE* 13(4): e0194803. <https://doi.org/10.1371/journal.pone.0194803> PMID: 29649237

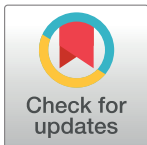

## OPEN ACCESS

**Citation:** The *PLOS ONE* Staff (2018) Correction: Bronchoalveolar lavage (BAL) cells in idiopathic pulmonary fibrosis express a complex pro-inflammatory, pro-repair, angiogenic activation pattern, likely associated with macrophage iron accumulation. *PLoS ONE* 13(5): e0197794. <https://doi.org/10.1371/journal.pone.0197794>

**Published:** May 17, 2018

**Copyright:** © 2018 The PLOS ONE Staff. This is an open access article distributed under the terms of the [Creative Commons Attribution License](https://creativecommons.org/licenses/by/4.0/), which permits unrestricted use, distribution, and reproduction in any medium, provided the original author and source are credited.
